# Supplementary material for: Molecular insights into adhesive mechanisms of phosphate-based dental adhesives on zirconia surfaces: effects of zirconia crystal structure
Source: Royal Society of Chemistry journal article supplement (doi:10.1039/d5tb00004a), 2025-01-01
Supplement: d5tb00004a1.pdf [file d5tb00004a1.pdf]

## **Electronic Supplementary Information (ESI)**

# **Molecular insights into adhesive mechanisms of phosphate-based dental adhesives on zirconia surfaces: effects of zirconia crystal structure**

Yosuke Sumiya,<sup>\*a</sup> Takahiro Uwabe<sup>b</sup>

<sup>a</sup> Graduate School of Sciences and Technology for Innovation, Yamaguchi University, 2-16-1

Tokiwadai, Ube, Yamaguchi 755-8611, Japan

<sup>b</sup> Institute for Materials Chemistry and Engineering and IRCCS, Kyushu University, Nishi-ku,

Fukuoka 819-0395, Japan.

\*Corresponding author Email: [yosuke.sumiya@yamaguchi-u.ac.jp](mailto:yosuke.sumiya@yamaguchi-u.ac.jp)

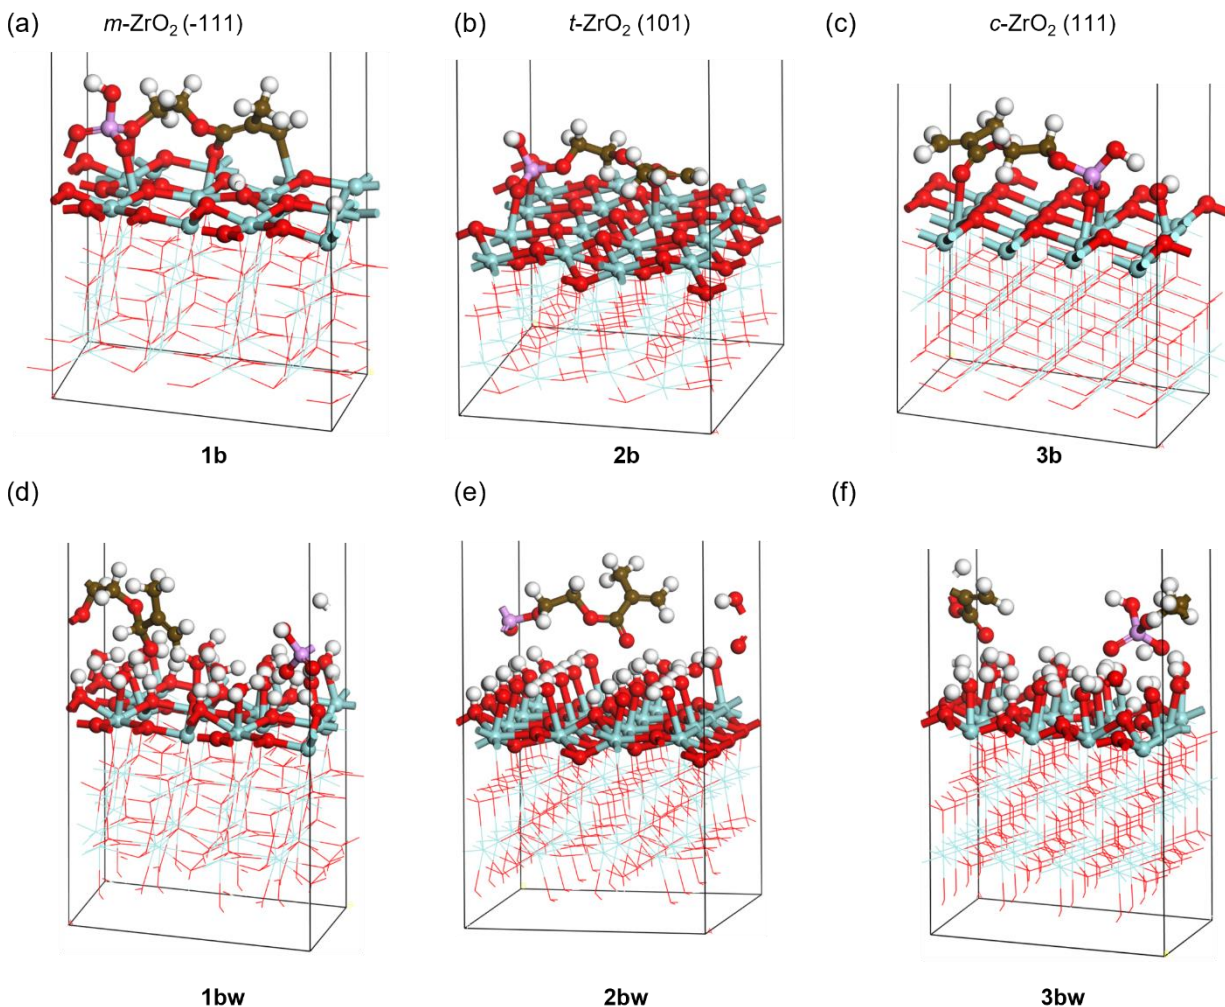

**Fig. S1** Fixed atoms in density functional theory (DFT) optimizations. Atoms represented by thin lines are fixed and atoms represented by ball & stick are relaxed. (a)  $m\text{-ZrO}_2(101)$ , (b)  $t\text{-ZrO}_2(-111)$ , (c)  $c\text{-ZrO}_2(111)$  surfaces. (d)-(f) are hydroxylated surfaces of (a)-(c).
